# Supplementary material for: Fabrication of Zn-Cu-Ni Ternary Oxides in Nanoarrays for Photo-Enhanced Pseudocapacitive Charge Storage
Source: MDPI journal article supplement (doi:10.3390/nano12142457), 2022-07-18
Supplement: s1 [file s1]

Article

# Fabrication of Zn-Cu-Ni Ternary Oxides in Nanoarrays for Photo-Enhanced Pseudocapacitive Charge Storage

Ruitong Xu <sup>1,†</sup>, Jun Pan <sup>2,†</sup>, Bo Wu <sup>2</sup>, Yangguang Li <sup>1</sup>, Hong-En Wang <sup>1,3,4</sup> and Ting Zhu <sup>1,3,4,\*</sup>

<sup>1</sup> School of Physics and Electronic Information, Yunnan Normal University, Kunming 650500, China; 2290781440@qq.com (R.X.); 2436391230@qq.com (Y.L.); hongen.wang@outlook.com (H.-E.W.)

<sup>2</sup> School of Materials Science & Engineering, Central South University, Changsha 410083, China; 964229306@qq.com (J.P.); 952068584@qq.com (B.W.)

<sup>3</sup> Yunnan Key Laboratory of Optoelectronic Information Technology, School of Physics and Electronic Information, Yunnan Normal University, Kunming 650500, China

<sup>4</sup> Key Laboratory of Advanced Technique & Preparation for Renewable Energy Materials, Ministry of Education, Yunnan Normal University, Kunming 650500, China

\* Correspondence: zhut0002@ynnu.edu.cn or [zhut0002@e.ntu.edu.sg](mailto:zhut0002@e.ntu.edu.sg)

† These authors contributed equally to this work.

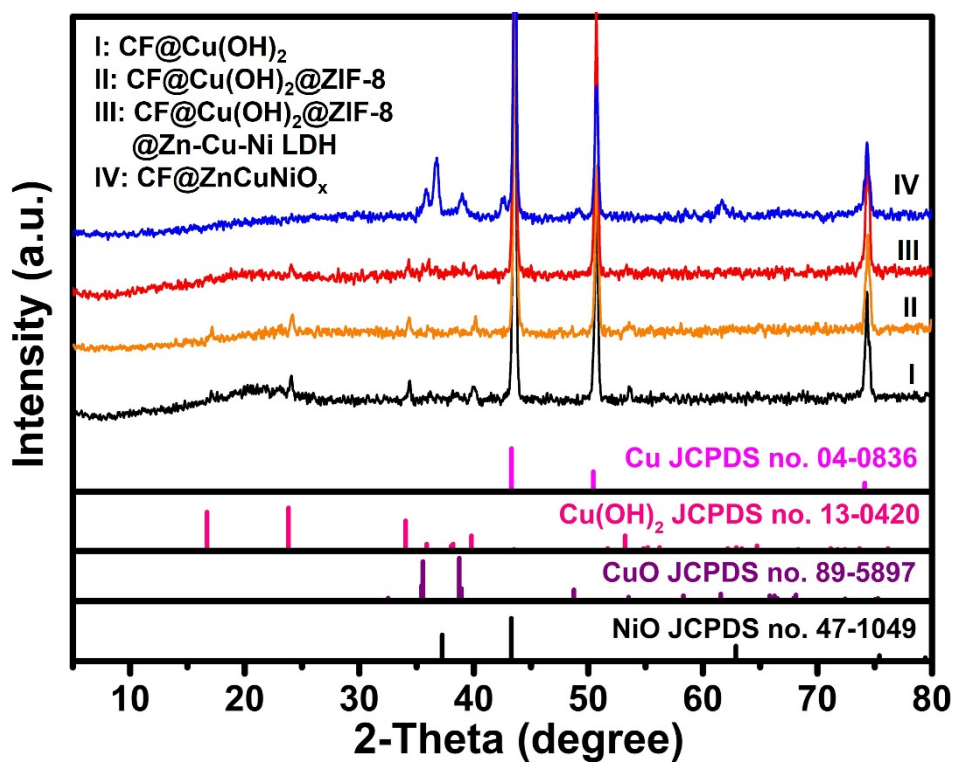

**Figure S1.** XRD patterns of CF@Cu(OH)<sub>2</sub>, CF@Cu(OH)<sub>2</sub>@ZIF-8, CF@Cu(OH)<sub>2</sub>@ZIF-8@Zn-Cu-Ni LDH, and CF@ZnCuNiO<sub>x</sub> samples, respectively.

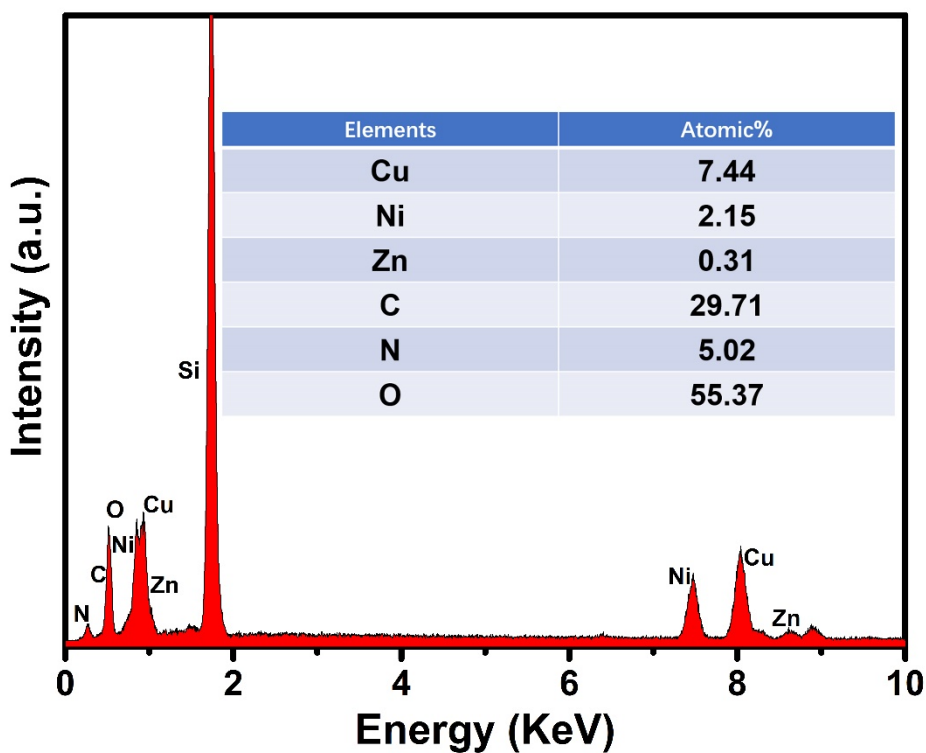

**Figure S2.** EDX spectrum of the Zn-Cu-Ni MMOs structure.

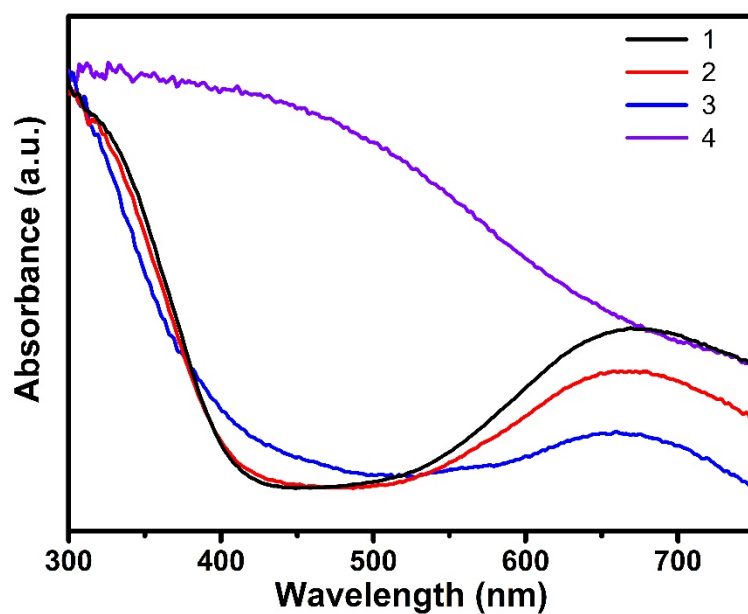

**Figure S3.** UV-vis DRS spectra (from curve 1 to 4) of the CF@Cu(OH)<sub>2</sub>, CF@Cu(OH)<sub>2</sub>@ZIF-8, CF@Cu(OH)<sub>2</sub>@ZIF-8@Zn-Cu-Ni LDH, and CF@ZnCuNiO<sub>x</sub> samples, respectively.

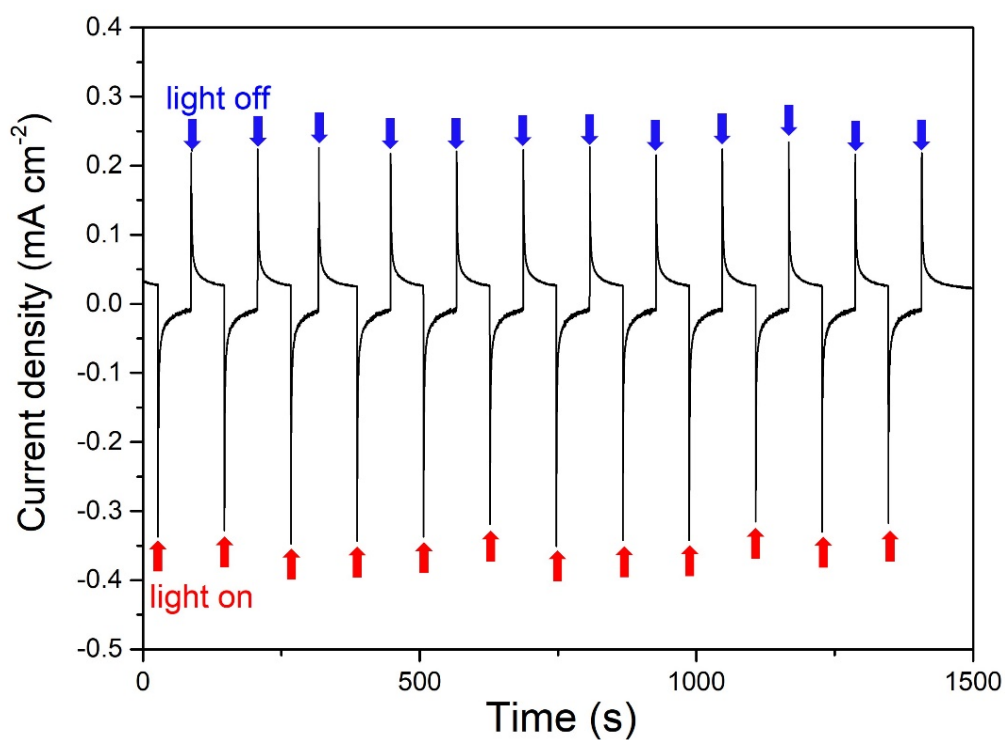

**Figure S4.** Photocurrent response recorded with chopped light irradiation (60 s interval) at an open circuit potential.

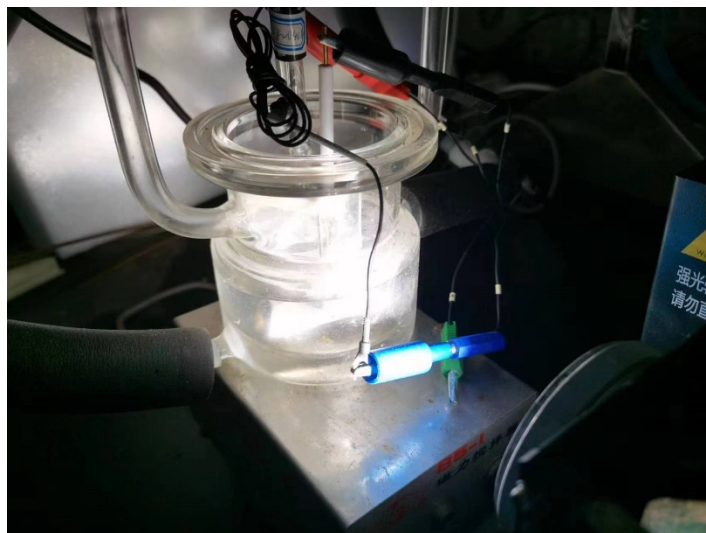

**Figure S5.** A photo of the three-electrode installation under light illumination with a circulating cooling water.

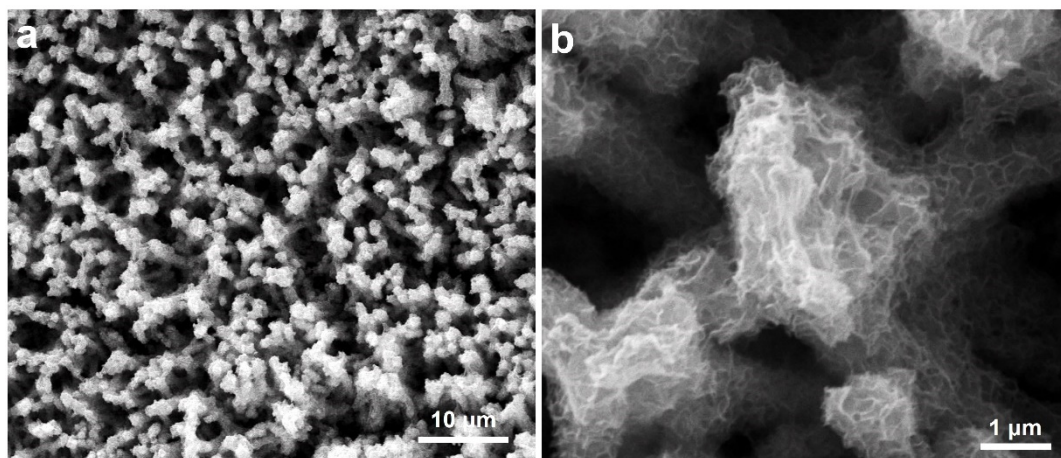

**Figure S6.** SEM images (a,b) of the CF@ZnCuNiO<sub>x</sub> NAs after the light on/off cycling test of Figure 6c.
